# Supplementary material for: Wetter environment and increased grazing reduced the area burned in northern Eurasia from 2002 to 2016
Source: Copernicus journal article supplement (doi:10.5194/bg-18-2559-2021), 2021-04-22
Supplement: Supplementary file 1 [file bg-18-2559-2021-supplement.pdf]

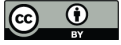

*Supplement of*

## **Wetter environment and increased grazing reduced the area burned in northern Eurasia from 2002 to 2016**

**Wei Min Hao et al.**

*Correspondence to:* Wei Min Hao ([wei.hao@usda.gov](mailto:wei.hao@usda.gov)) and Shawn Urbanski ([shawn.p.urbanski@usda.gov](mailto:shawn.p.urbanski@usda.gov))

The copyright of individual parts of the supplement might differ from the article licence.

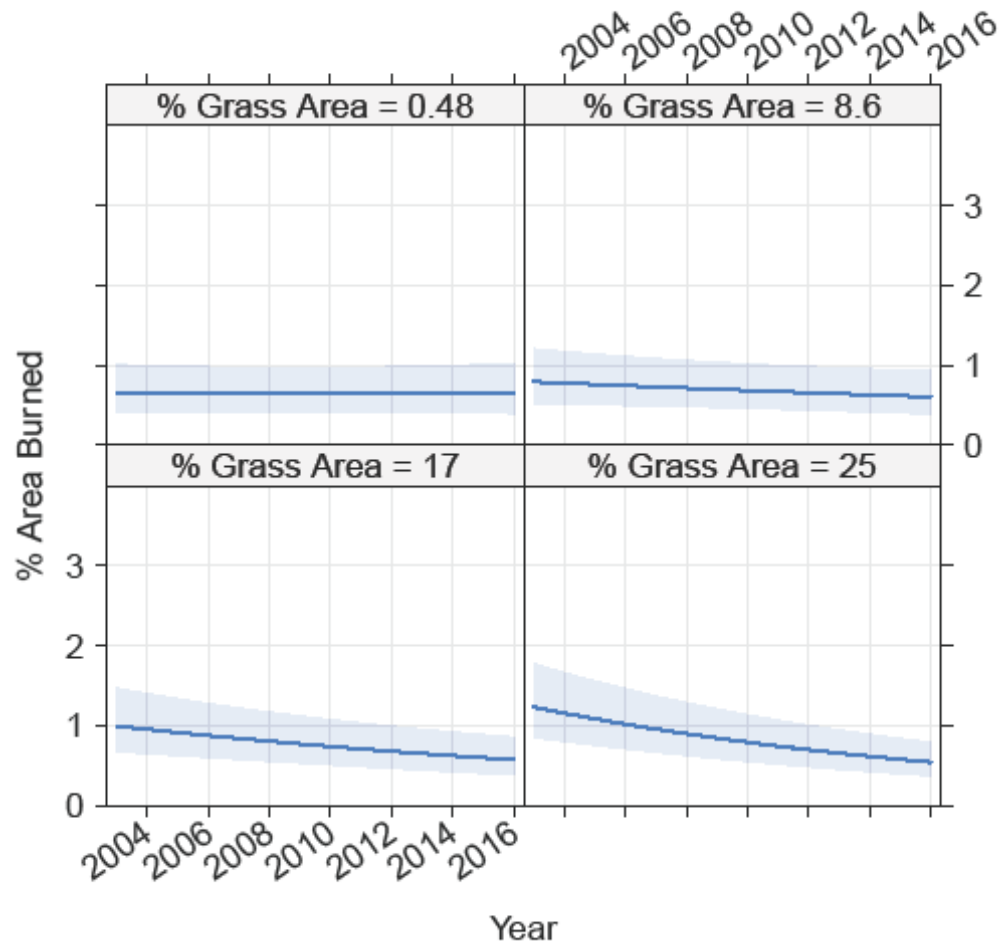

**Fig. S1.1.** Effects of year and percent of grass area on the area burned.

20  
21  
22

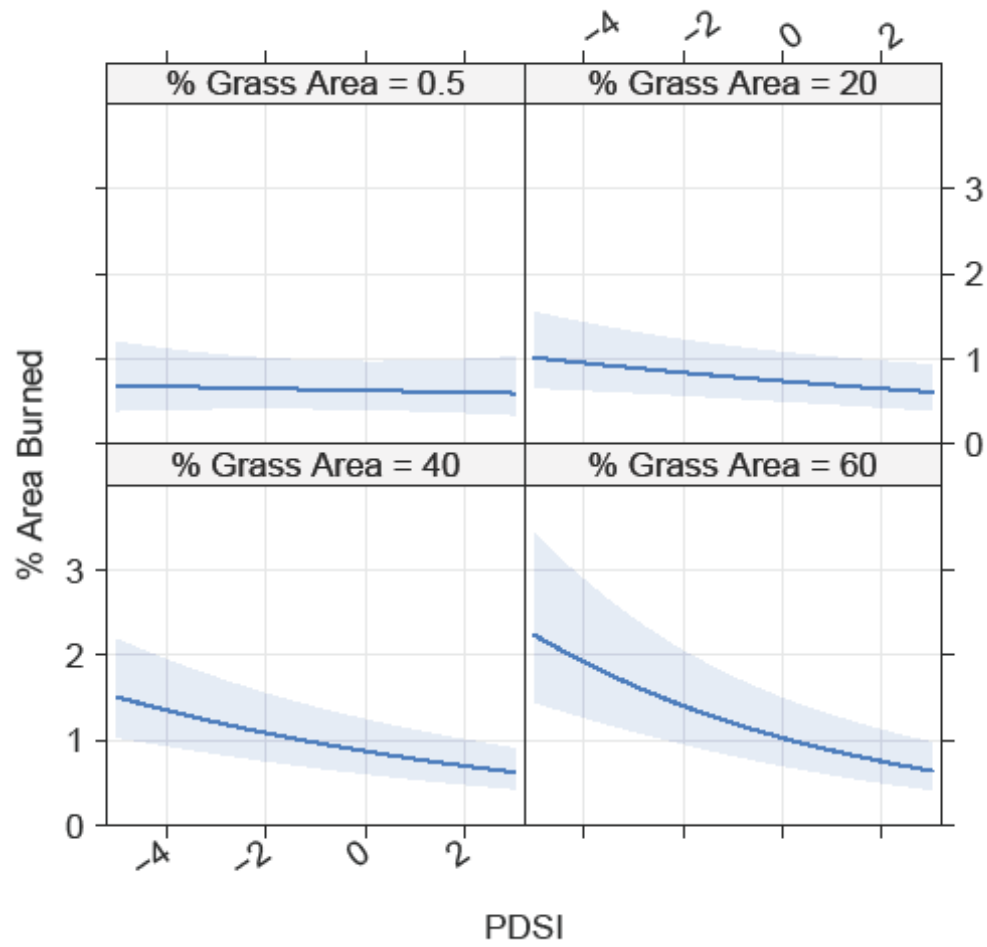

**Fig. S1.2.** Effects of PDSI and percent of grass area on the area burned.

23  
24  
25  
26  
27

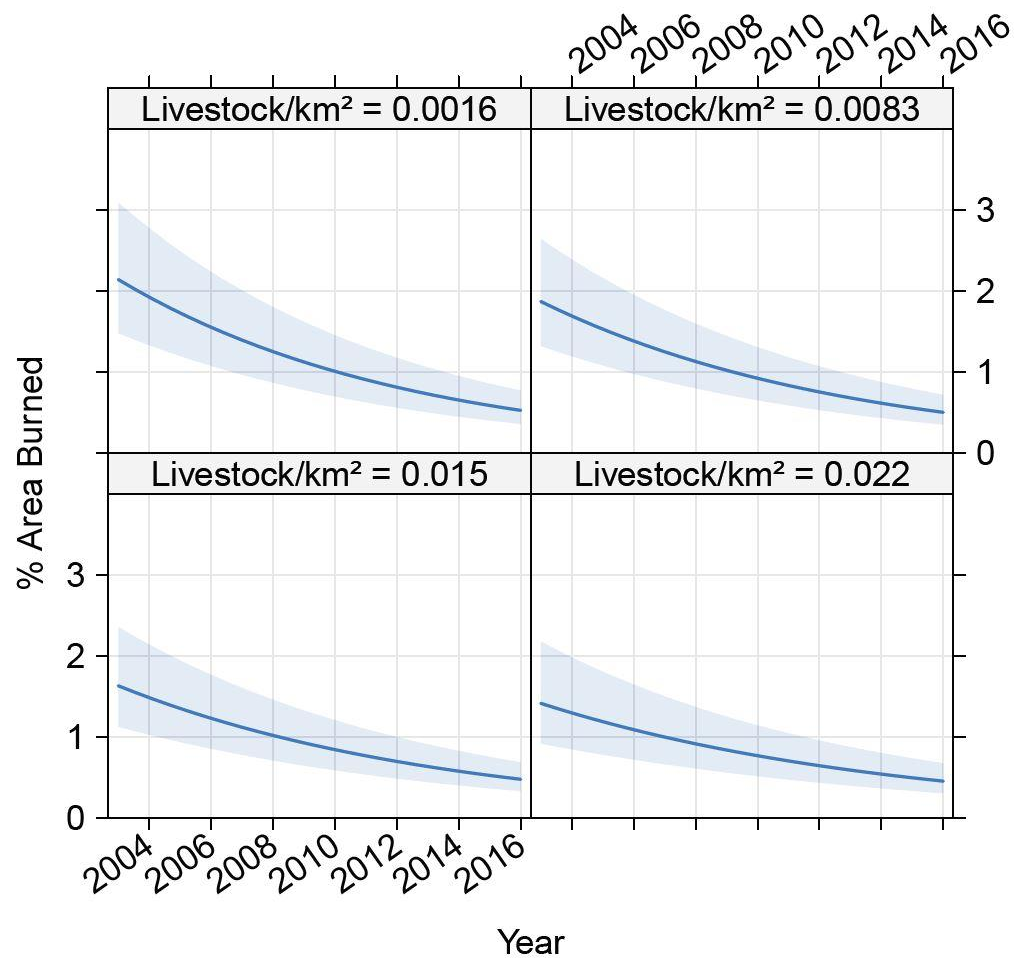

**Fig. S1.3.** Effects of livestock density and year on the area burned.

28  
29  
30  
31

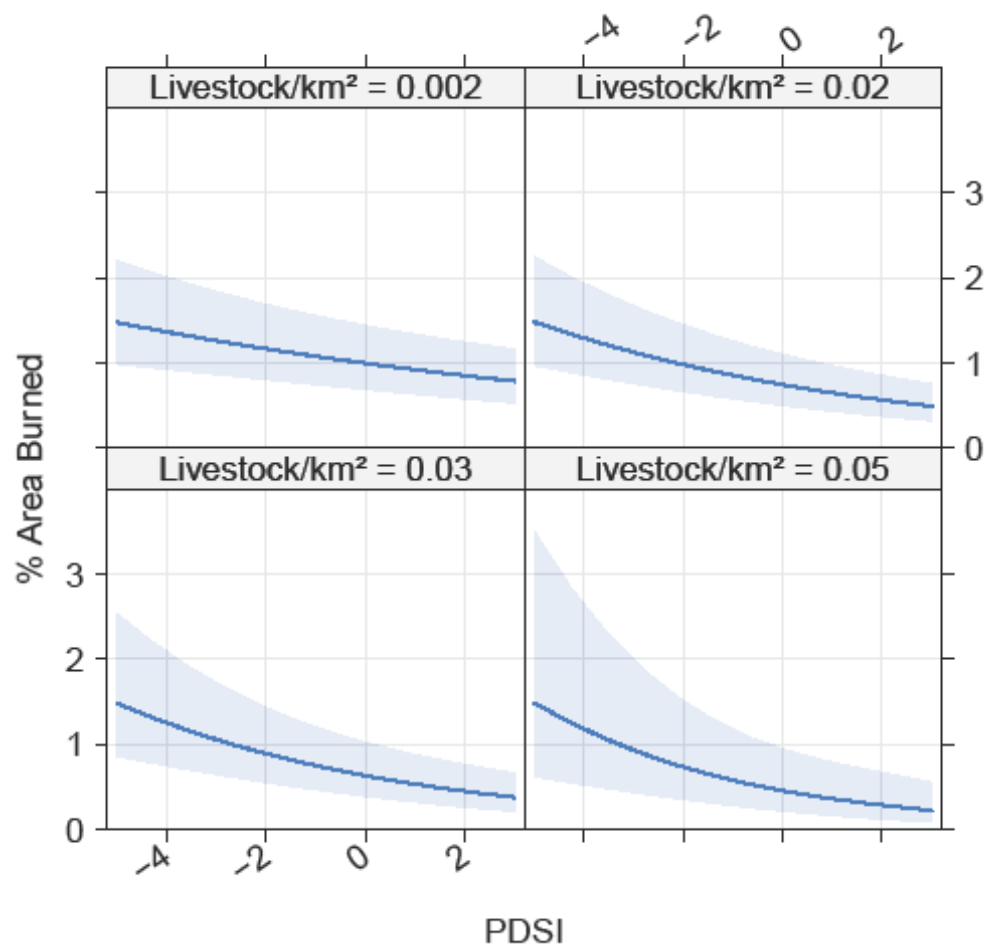

**Fig. S1.4.** Effects of PDSI and livestock density on the area burned.

32  
33  
34  
35  
36  
37

38  
39  
40  
41  
42  
43

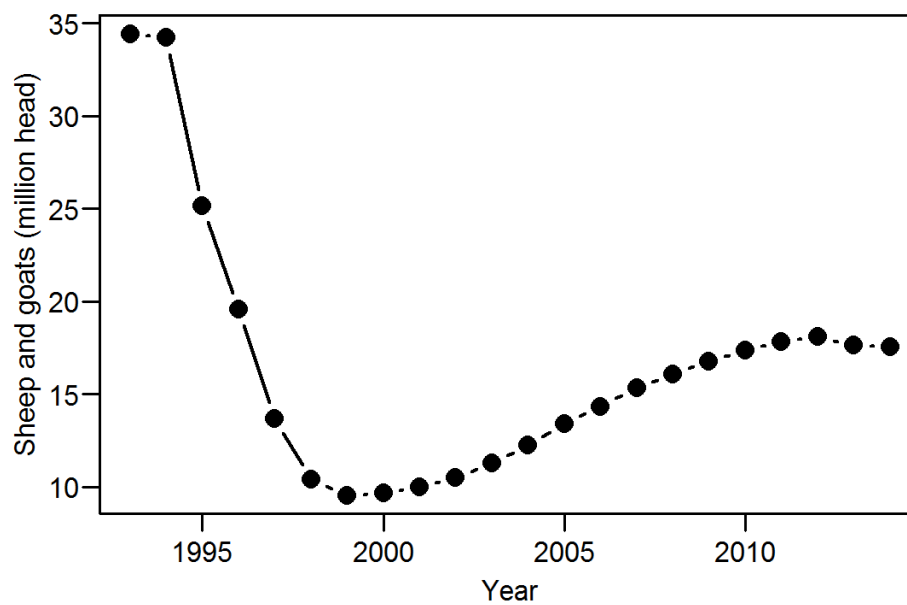

**Fig. S2:** Number of sheep and goats in Kazakhstan from 1993 to 2014 (Food and Agriculture Organization, 2016).

44  
45  
46  
47  
48

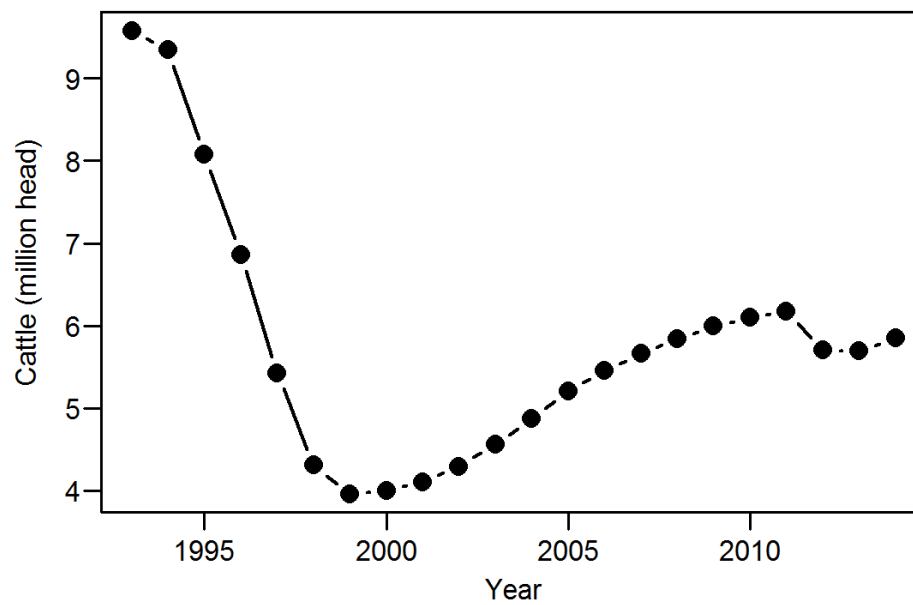

**Fig. S3.** Number of cattle in Kazakhstan from 1993 to 2014 (Food and Agriculture Organization, 2016).

49  
50  
51  
52  
53
